# Supplementary material for: Data for the morphometric characterization of NT2-derived postmitotic neurons
Source: PubMed Central journal article supplement (PMC4845154; doi:10.1016/j.dib.2016.04.021), 2016-04-13
Supplement: mmc1.pdf [file mmc1.pdf]

Advertencia: este formulario no es compatible con la versi3n actual de Acrobat o Adobe Reader.  
Actualice el programa a la 3ltima versi3n para una compatibilidad total.
